# Supplementary material for: Comparison between Colistin and Polymyxin B in the Treatment of Bloodstream Infections Caused by Carbapenem-Resistant Pseudomonas aeruginosa and Acinetobacter baumannii-calcoaceticus Complex
Source: MDPI journal article supplement (doi:10.3390/antibiotics12081317), 2023-08-15
Supplement: s1 [file s1]

**Supplementary Table S1. Combination antimicrobial therapy in patients with *Pseudomonas aeruginosa* or *Acinetobacter baumannii-calcoaceticus* Complex bloodstream infections**

| Combination therapy     | Total      | Antimicrobial Therapy |                |
|-------------------------|------------|-----------------------|----------------|
|                         | N= 259     | Polymyxin B, N=212    | Colistin, N=47 |
| Ampicillin/sulbactam    | 11 (4.2)   | 9 (4.2)               | 2 (4.3)        |
| Ceftazidime             | 4 (1.5)    | 3 (1.4)               | 1 (2.1)        |
| Cefepime                | 2 (0.8)    | 1 (0.5)               | 1 (2.1)        |
| Piperacillin/tazobactam | 7 (2.7)    | 5 (2.3)               | 2 (4.3)        |
| Ciprofloxacin           | 2 (0.8)    | 1 (0.5)               | 1 (2.1)        |
| Amikacin                | 55 (21.2)  | 37 (17.4)             | 18 (38.3)      |
| Gentamicin              | 3 (1.2)    | 3 (1.4)               | 0              |
| Ertapenem               | 11 (4.2)   | 11 (5.2)              | 0              |
| Meropenem               | 182 (70.0) | 148 (69.5)            | 34 (72.3)      |
| Tigecycline             | 21 (8.1)   | 16 (7.5)              | 5 (10.6)       |
| Ceftazidime/avibactam   | 8 (3.1)    | 4 (1.9)               | 4 (8.5)        |

Results are presented as n (%).

**Supplementary Table S2- 30-day mortality according to subgroup analysis.**

|                                | Polymyxin B<br>(N=212) | Colistin<br>(N=47) | Hazard Ratio*<br>(95%CI) | P value |
|--------------------------------|------------------------|--------------------|--------------------------|---------|
| Bacteria                       |                        |                    |                          | 0.11    |
| <i>Acinetobacter baumannii</i> | 80/165 (48.2%)         | 22/39 (56.4%)      | 0.92(0.6 – 1.5)          | 0.74    |
| <i>Pseudomonas aeruginosa</i>  | 22 /47 (46.8%)         | 5 /8 (62.5%)       | 0.47 (0.2 – 1.3)         | 0.15    |
| Baseline ICU Admission         |                        |                    |                          | 0.40    |
| Yes                            | 83/146 (56.8%)         | 25/38 (65.8%)      | 1.30 (0.8-1.2)           | 0.29    |
| No                             | 19/66 (28.8%)          | 2/9 (22.2%)        | 0.72 (0.2-3.2)           | 0.66    |

ICU, Intensive Care Unit.

\*Adjusted for COVID-19 infection, Pitt bacteremia score, Charlson Comorbidity Index and time from bacteremia to active antimicrobial treatment.
